# Supplementary figures and images for: Health Providers’ Response to Female Adolescents’ Survivors of Sexual Violence, and Demand Side Barriers in the Utilization of Support Services in Urban Slums of Nigeria
Source: Preprints.org preprint supplement (doi:10.20944/preprints202307.1627.v1), 2023-07-25

Figure 1 showing various barriers in accessing health services


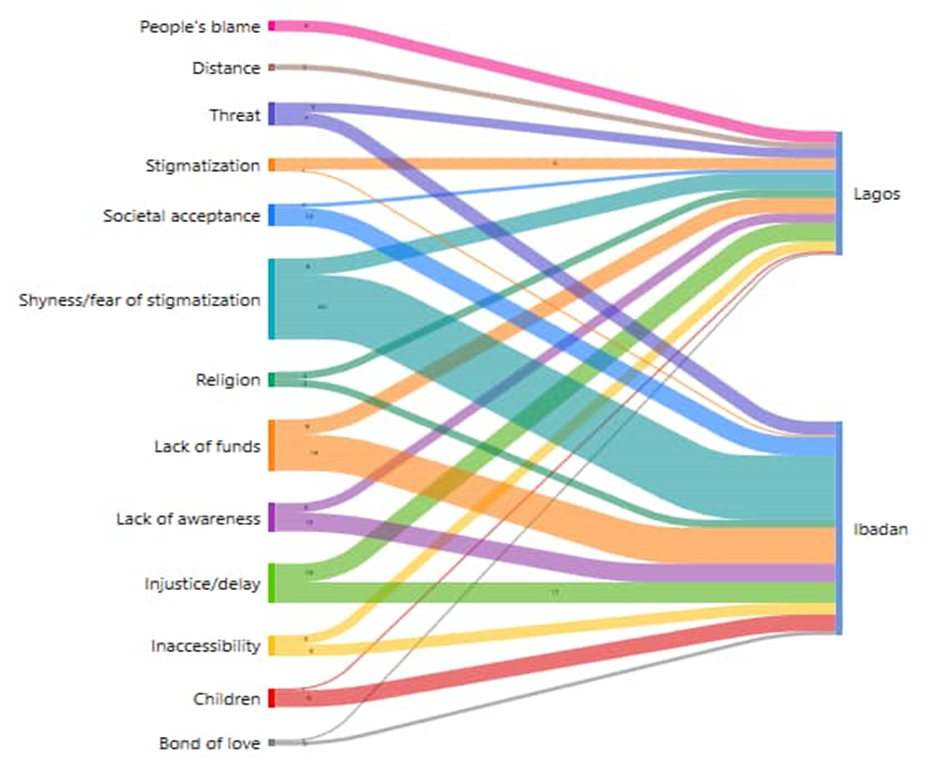

Supplement: Supplementary file 1 [file Appendix 1_Figure_showing various barriers in accessing health services.docx]

Figure 2. shows challenges in giving adequate services by providers


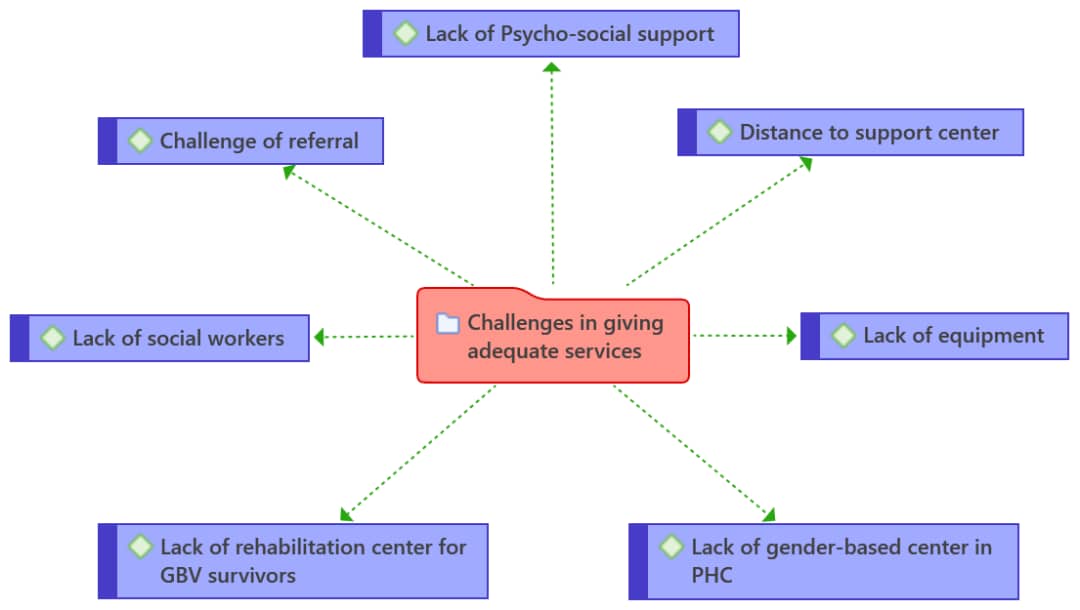

Supplement: Supplementary file 2 [file Appendix 2_Figure 2_Service challenges.docx]
